# Supplementary material
Source: PubMed Central journal article supplement (PMC9081222)
Supplement: NIHMS1785704-supplement-4.pdf [file NIHMS1785704-supplement-4.pdf]

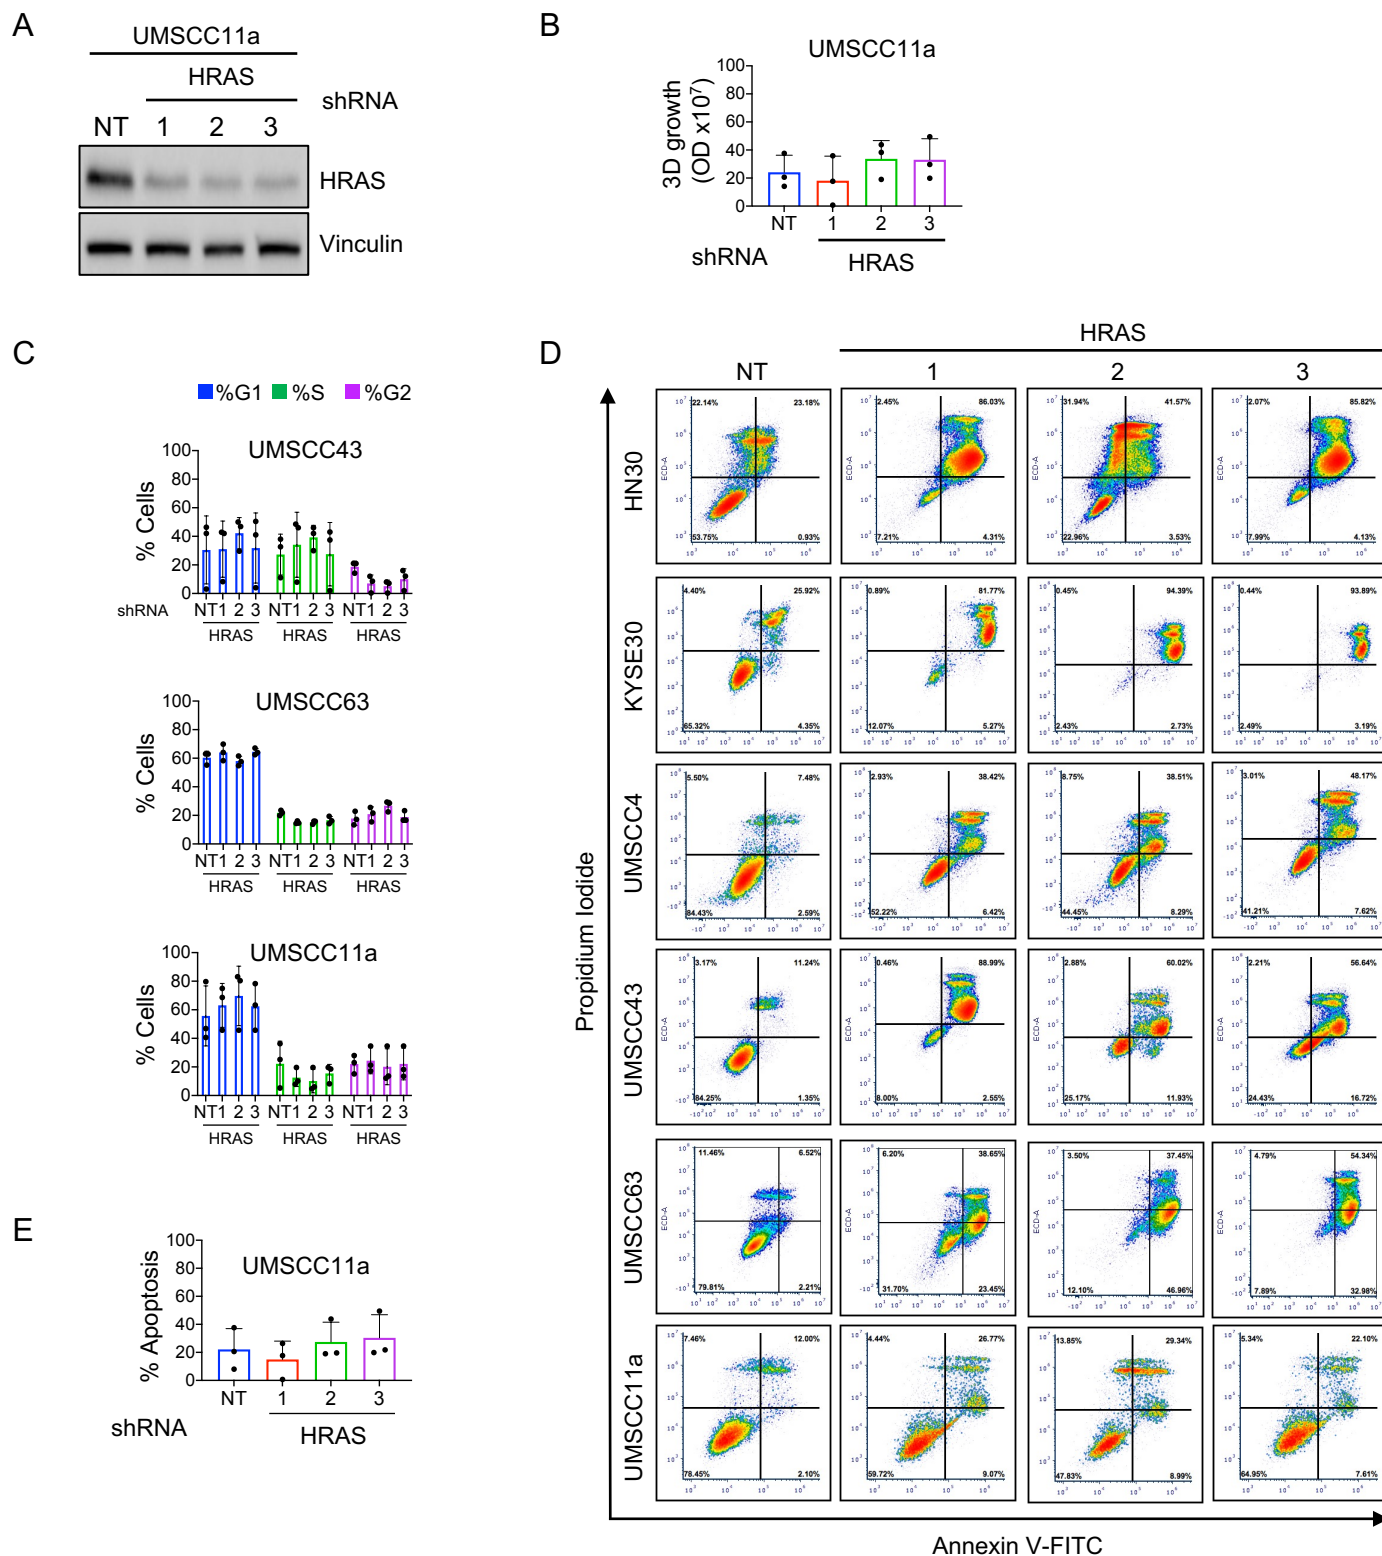

### Supplementary Figure 1: Consequences of HRAS knockdown in an HRAS WT HNSCC cell line

UMSSC11a is HRAS WT; all other cell lines shown are HRAS mutant. Data are representative (A, D) or the average  $\pm$  SD (B, C, E) of at least 3 independent experiments.

A) Western blot showing knockdown of HRAS protein in HRAS WT HNSCC line UMSSC11a. Cells were transduced with anti-HRAS shRNA and selected in puromycin for 72 hr.

B) Quantification of 3D colonies formed following HRAS knockdown. UMSSC11a cells treated as in panel A were grown in Matrigel for 2 weeks, then stained with alamarBlue.

C) Cell cycle distribution following HRAS knockdown, treated as in panel A. Only UMSSC11a cells are HRAS WT. Cells were stained with propidium iodide and subjected to flow cytometry. Related to Fig 1E-F.

D) Distribution of apoptotic cells following HRAS knockdown. Cells were stained with Annexin V-FITC and propidium iodide and apoptotic cells assessed by flow cytometry. Related to Fig 1G.

E) Quantification of apoptosis in UMSSC11a cells; representative example in panel D.

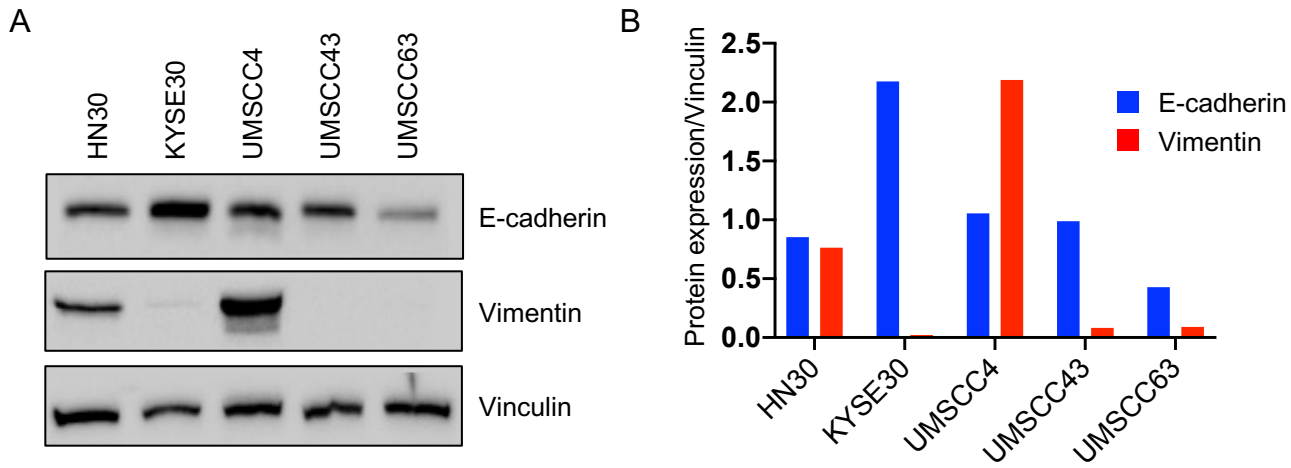

**Supplementary Figure 2: HRAS mutant HNSCC cell lines exhibit heterogenous expression of EMT markers**

A) Western blot showing basal expression of E-cadherin and vimentin. Early passage HRAS mutant HNSCC cells were lysed and immunoblotted as indicated.

B) Densitometric quantification of data in panel (A). Expression was normalized to that of vinculin loading control.

A

| KEGG Pathway Analysis (Top 10% of hits) |                     |                                         |                     |
|-----------------------------------------|---------------------|-----------------------------------------|---------------------|
| Tipifarnib (2 weeks)                    |                     | Tipifarnib (4 weeks)                    |                     |
| Term description                        | Observed gene count | Term description                        | Observed gene count |
| Metabolic pathways                      | 25                  | Pathways in cancer                      | 17                  |
| PI3K-AKT signaling pathway              | 17                  | Insulin signaling pathway               | 14                  |
| Pathways in cancer                      | 17                  | MAPK signaling pathway                  | 14                  |
| Human papillomavirus infection          | 16                  | Thermogenesis                           | 12                  |
| Neuroactive ligand-receptor interaction | 13                  | PI3K-AKT signaling pathway              | 12                  |
| AMPK signaling pathway                  | 12                  | Transcriptional misregulation in cancer | 11                  |
| Insulin signaling pathway               | 11                  | Chemokine signaling pathway             | 11                  |
| Viral carcinogenesis                    | 11                  | HTLV-I infection                        | 11                  |
| cAMP signaling pathway                  | 11                  | Human papillomavirus infection          | 11                  |
| MAPK signaling pathway                  | 11                  | NF-kappa B signaling pathway            | 10                  |

B

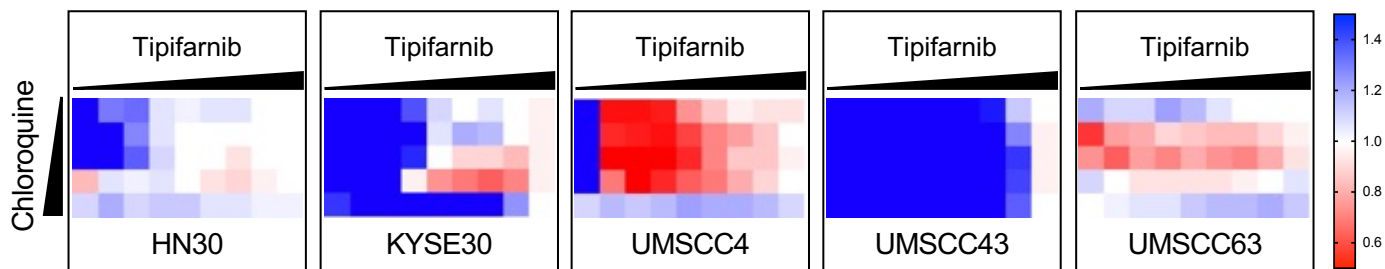

C

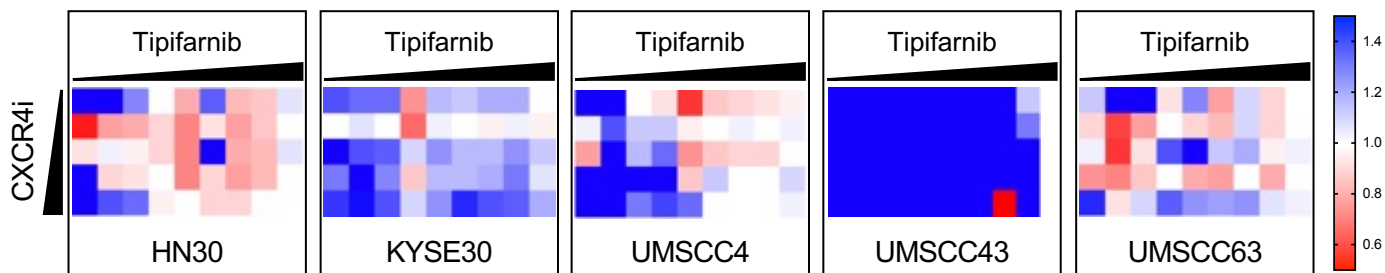

D

| GI <sub>50</sub> (M) |          |           |
|----------------------|----------|-----------|
| Cell Line            | ERKi (M) | PI3Ki (M) |
| HN30                 | 1.99E-06 | 6.83E-06  |
| KYSE30               | 1.70E-07 | 6.08E-06  |
| UMSCC4               | 1.53E-05 | 1.68E-04  |
| UMSCC43              | 7.62E-07 | 2.17E-07  |
| UMSCC63              | 4.89E-07 | 3.86E-06  |

### **Supplementary Figure 3: KEGG pathway analysis of top hits for tipifarnib sensitizers**

- A) Top 10 pathways enriched after tipifarnib treatment for 2 or 4 weeks. The top 10% of hits from each dataset from CRISPR-Cas9 loss-of-function screens in Figure 5 were entered into db-String.
- B) Bliss scores quantifying synergy between tipifarnib (1.5 nM - 10  $\mu$ M) and autophagy inhibitor chloroquine (0.78 - 12.5  $\mu$ M). Cells were treated for 5 days.
- C) Bliss scores quantifying synergy between tipifarnib (1.5 nM - 10  $\mu$ M) and CXCR4 inhibitor WZ811 (100 - 1600 nM).
- D) GI<sub>50</sub> values for PI3K-alpha inhibitor alpelisib and ERK1/2 inhibitor SCH772984 across the panel of cell lines.



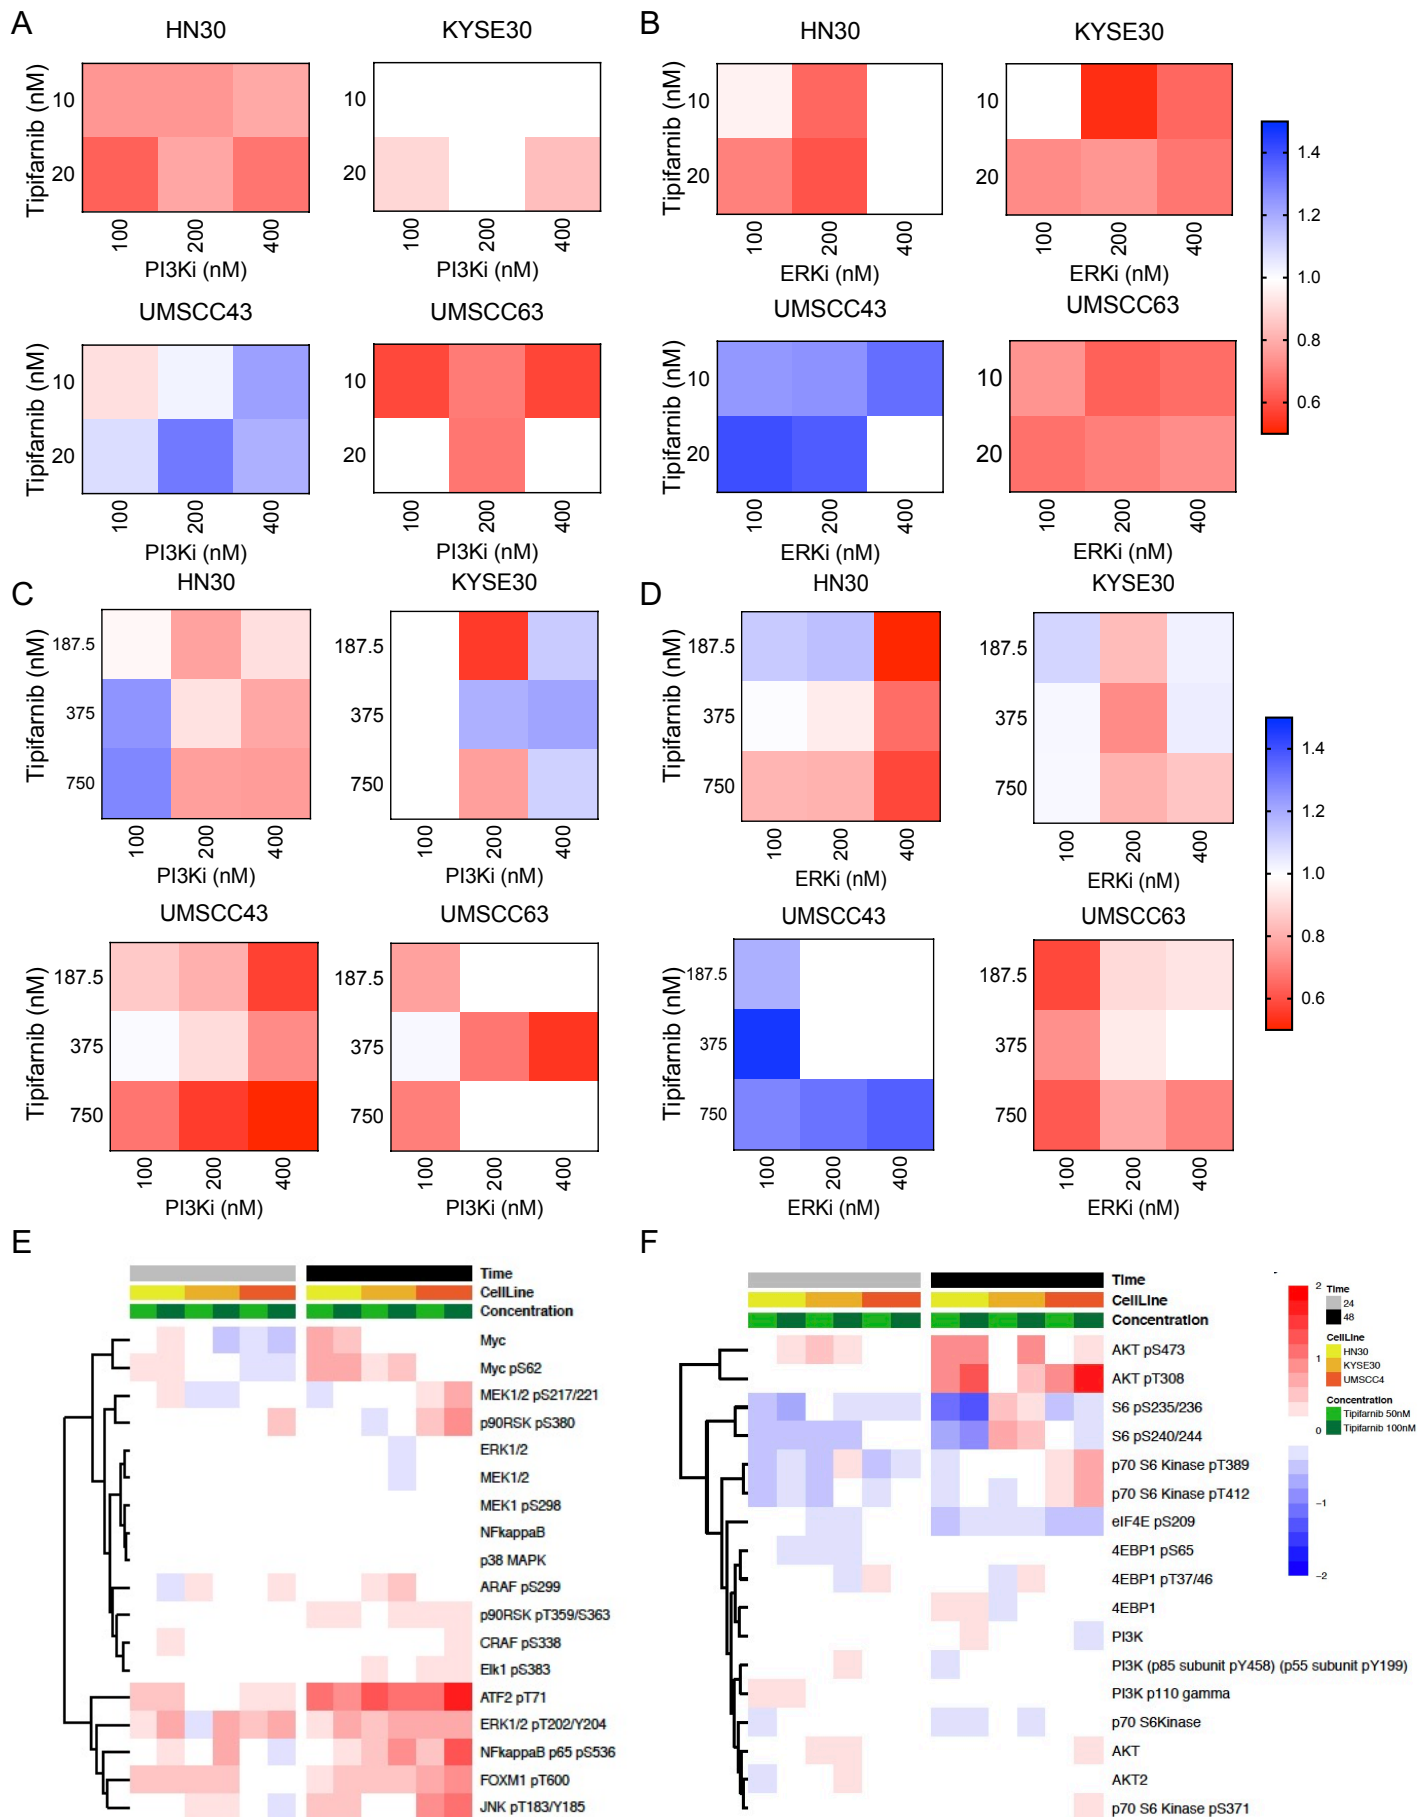

#### **Supplementary Figure 4: Combinations of tipifarnib with PI3K-alpha inhibitor or ERK1/2 inhibitor are synergistic**

A-D) Calculation of Bliss scores for apoptosis assays to determine synergy of combinations between low (A, B) or high dose (C, D) tipifarnib and indicated doses of inhibitors of ERK1/2 or PI3K-alpha. Data are from cells treated and analyzed in Fig 6A-D.

E) Heatmap showing changes in activation of the MAPK signaling pathway and key ERK substrates. RPPA analysis was performed on HRAS mutant cell lines treated with tipifarnib for 24 or 48 h, as shown in Fig 3B.

F) Heatmap showing changes in activation of the PI3K-AKT-mTOR signaling pathway. RPPA analysis was performed on HRAS mutant cell lines treated with tipifarnib for 24 or 48 h, as shown in Fig 3B.

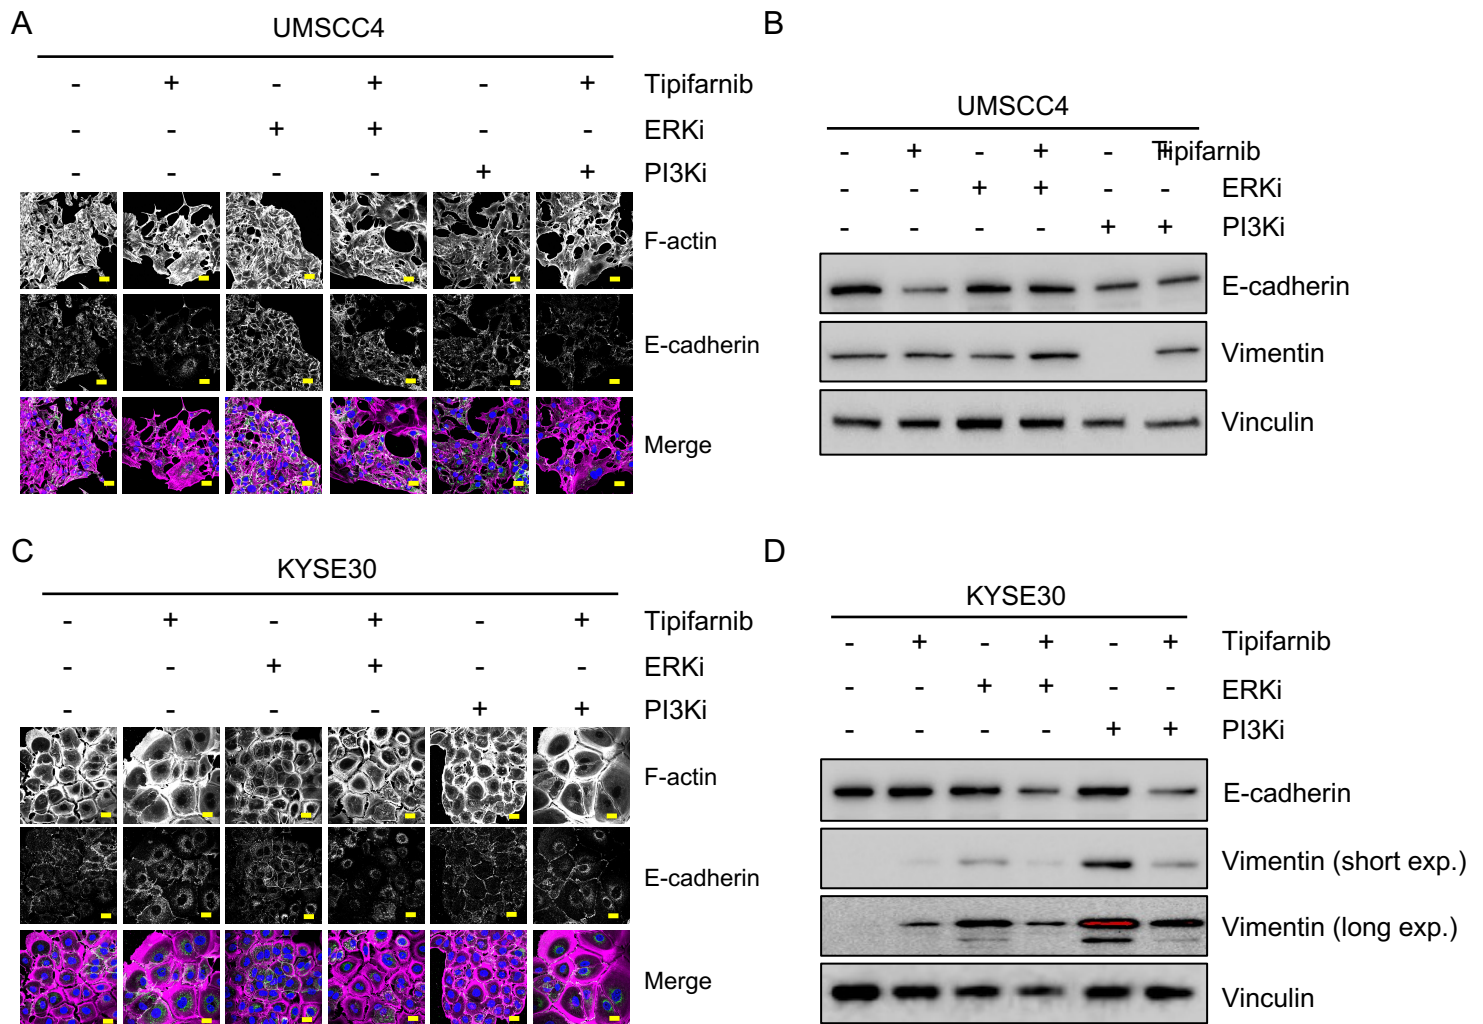

**Supplementary Figure 5: Combination of tipifarnib with ERKi and PI3Ki alters the distribution and expression of E-cadherin and vimentin**

A, C) Immunofluorescence images showing expression and distribution of F-actin and E-cadherin in UMSCC4 and KYSE30 cells, respectively, in response to combinations of tipifarnib with ERKi or PI3Ki. Cells were treated as in Fig 6E, F. In the merge image, F-actin is shown in magenta, E-cadherin in green and the nucleus in blue. Scale bar = 20 mm.

B, D) Western blots showing expression of E-cadherin and vimentin in UMSCC4 and KYSE30 in response to combinations of tipifarnib with ERKi or PI3Ki. Lysates taken from same cells as in (A, C).

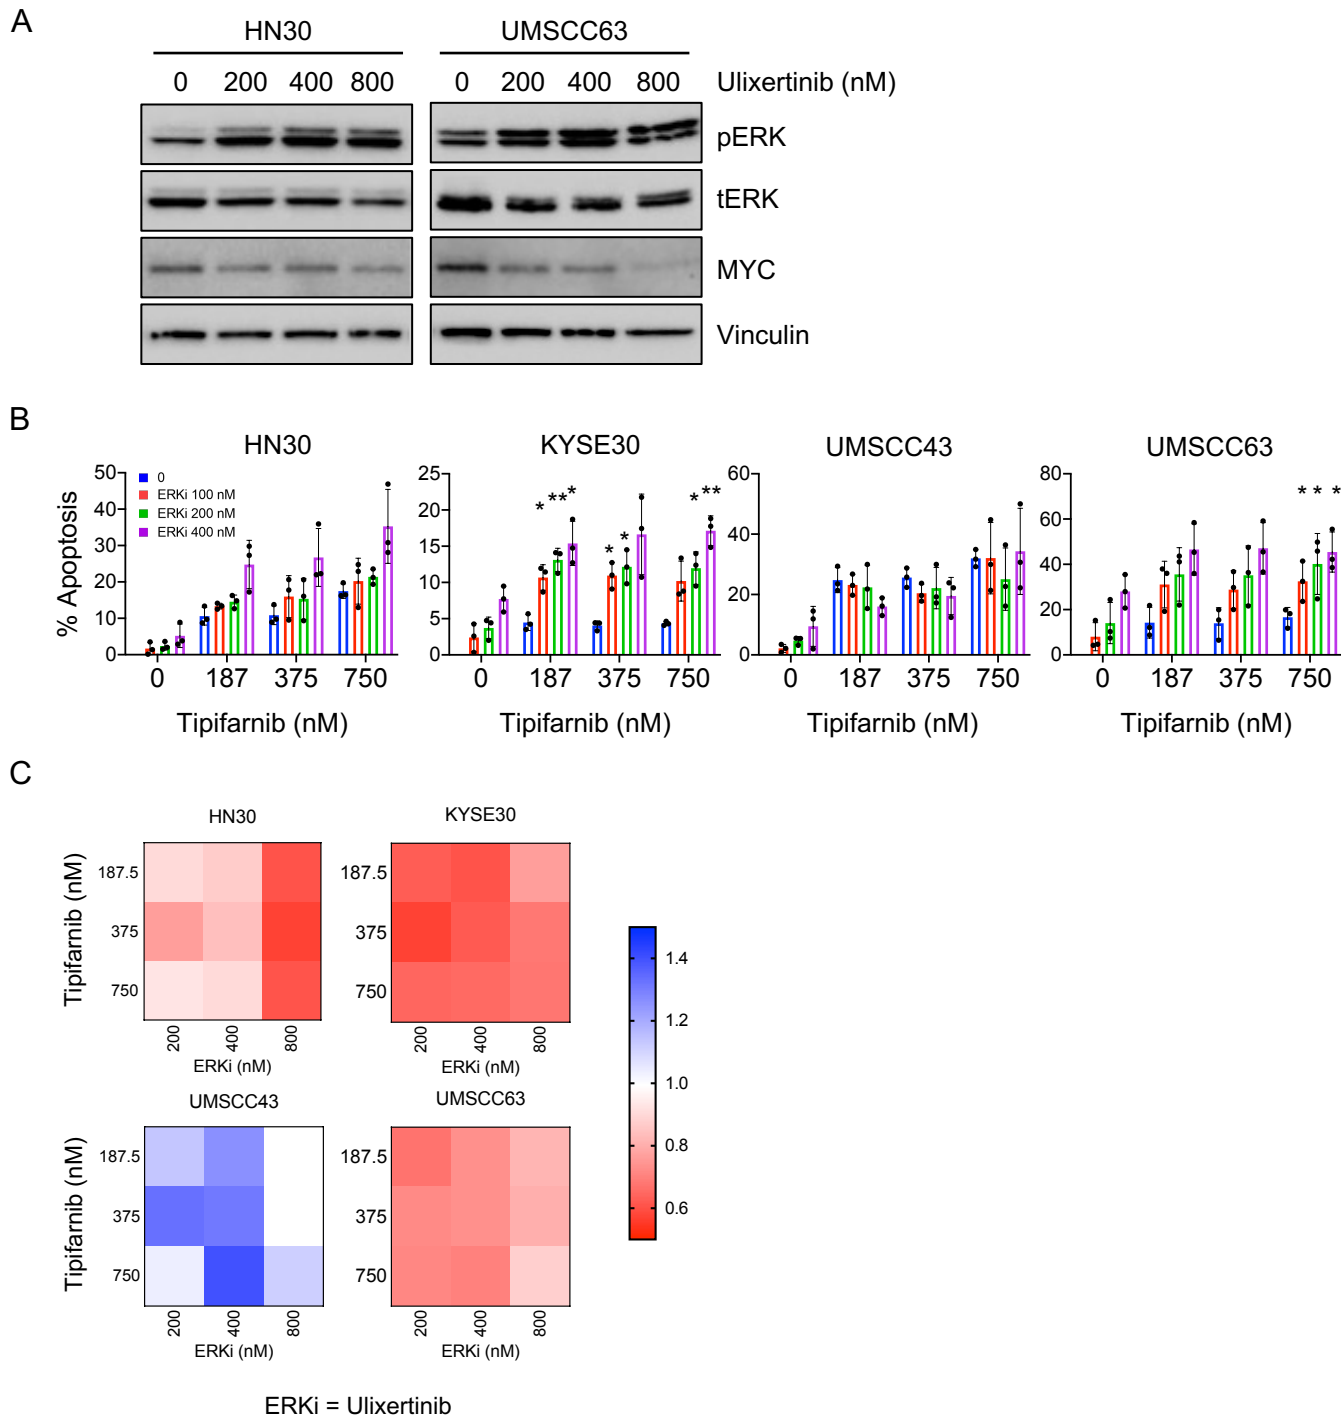

### Supplementary Figure 6: Combination of FTI tipifarnib with clinical candidate ERKi causes apoptosis in HRAS mutant HNSCC

A) Western blot showing target inhibition of MAPK pathway by ERK1/2 inhibitor ulixertinib/BVD-523. Cells were treated for 48 h then blotted for pERK and MYC. Although pERK has rebounded at this time point, as expected with this ATP-competitive inhibitor, ERK substrate MYC is still reduced indicating continued pathway inhibition.

B) Quantification of apoptosis. Cells were treated with the indicated doses of tipifarnib and ulixertinib for five days. Annexin-FITC positive cells were quantified and normalized to vehicle control. Data represent the average  $\pm$  SD of three independent replicates; values above zero are shown. P value: combination versus tipifarnib alone. \*P<0.05, \*\*P<0.01, \*\*\*P<0.001

C) Bliss scores quantifying synergy between tipifarnib and ERK1/2 inhibitor, calculated from apoptosis data in (B).
